# Supplementary material
Source: Springer Nature journal article supplement (https://www.springermedizin.de/resource/supplementary/12901_2012_84_MOESM6_ESM.pdf/9515208)

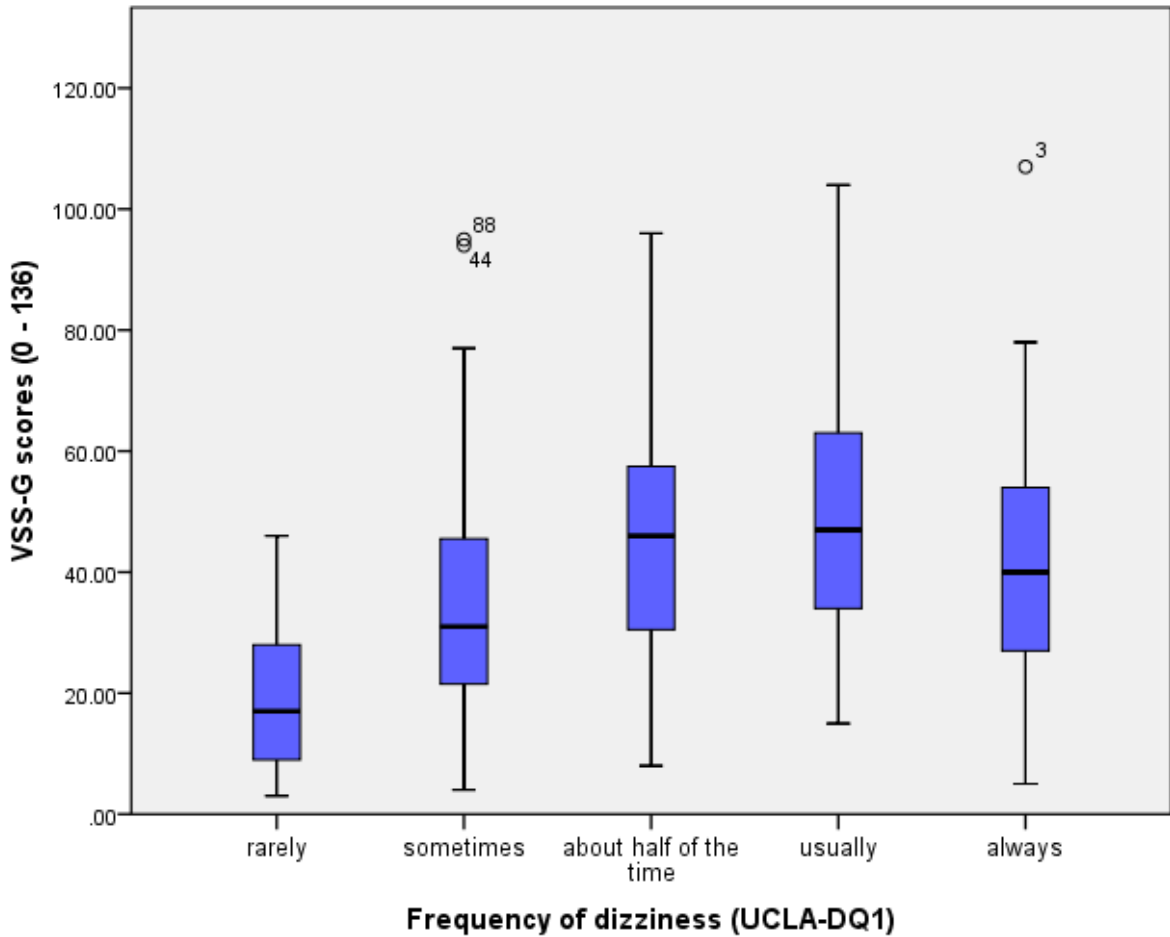

Supplement: MOESM6 [file 9515208]
